# Supplementary material for: Facile repurposing of peptide–MHC-restricted antibodies for cancer immunotherapy
Source: PubMed Central journal article supplement (PMC10344781; doi:10.1038/s41587-022-01567-w), 2023-01-02
Supplement: 41587_2022_1567_MOESM2_ESM.pdf [file 41587_2022_1567_MOESM2_ESM.pdf]

## Reporting Summary

Nature Portfolio wishes to improve the reproducibility of the work that we publish. This form provides structure for consistency and transparency in reporting. For further information on Nature Portfolio policies, see our [Editorial Policies](#) and the [Editorial Policy Checklist](#).

### Statistics

For all statistical analyses, confirm that the following items are present in the figure legend, table legend, main text, or Methods section.

n/a | Confirmed

- The exact sample size ( $n$ ) for each experimental group/condition, given as a discrete number and unit of measurement
- A statement on whether measurements were taken from distinct samples or whether the same sample was measured repeatedly
- The statistical test(s) used AND whether they are one- or two-sided  
*Only common tests should be described solely by name; describe more complex techniques in the Methods section.*
- A description of all covariates tested
- A description of any assumptions or corrections, such as tests of normality and adjustment for multiple comparisons
- A full description of the statistical parameters including central tendency (e.g. means) or other basic estimates (e.g. regression coefficient) AND variation (e.g. standard deviation) or associated estimates of uncertainty (e.g. confidence intervals)
- For null hypothesis testing, the test statistic (e.g.  $F$ ,  $t$ ,  $r$ ) with confidence intervals, effect sizes, degrees of freedom and  $P$  value noted  
*Give  $P$  values as exact values whenever suitable.*
- For Bayesian analysis, information on the choice of priors and Markov chain Monte Carlo settings
- For hierarchical and complex designs, identification of the appropriate level for tests and full reporting of outcomes
- Estimates of effect sizes (e.g. Cohen's  $d$ , Pearson's  $r$ ), indicating how they were calculated

*Our web collection on [statistics for biologists](#) contains articles on many of the points above.*

### Software and code

Policy information about [availability of computer code](#)

Data collection

BD Accuri C6 software  
Cytoflex (Beckman Coulter)  
Biacore Control T100  
illumina Miseq  
SSRL Beamline BL12

Data analysis

GraphPad Prism 8.0  
Biacore Evaluation T100  
CCP4 package v7.0  
PHASERV2.5.5  
Phenix v1.12  
COOT v0.9.6  
CyteExpert 2.0.0.153  
FlowJo 10.2  
Custom code for deep-sequencing data processing is available: <https://github.com/jlmendozabio/NGSpeptideprepandpred>

For manuscripts utilizing custom algorithms or software that are central to the research but not yet described in published literature, software must be made available to editors and reviewers. We strongly encourage code deposition in a community repository (e.g. GitHub). See the Nature Portfolio [guidelines for submitting code & software](#) for further information.

## Data

Policy information about [availability of data](#)

All manuscripts must include a [data availability statement](#). This statement should provide the following information, where applicable:

- Accession codes, unique identifiers, or web links for publicly available datasets
- A description of any restrictions on data availability
- For clinical datasets or third party data, please ensure that the statement adheres to our [policy](#)

The protein sequences used for target prediction were obtained from Uniprot (<http://www.uniprot.org/>). The proteome ID is UP000005640. The raw and processed sequencing data are deposited into GEO database under accession number GSE210479 and GSM6430986. The coordinates for the structure of the MA2/MART/HLA-A2 complex have been deposited in the PDB under accession code 7TR4. All supporting data is available from authors upon request. Materials are available upon request through Materials Transfer Agreement with Stanford University.

## Human research participants

Policy information about [studies involving human research participants and Sex and Gender in Research](#).

Reporting on sex and gender

Population characteristics

Recruitment

Ethics oversight

Note that full information on the approval of the study protocol must also be provided in the manuscript.

## Field-specific reporting

Please select the one below that is the best fit for your research. If you are not sure, read the appropriate sections before making your selection.

Life sciences  Behavioural & social sciences  Ecological, evolutionary & environmental sciences

For a reference copy of the document with all sections, see [nature.com/documents/nr-reporting-summary-flat.pdf](https://www.nature.com/documents/nr-reporting-summary-flat.pdf)

## Life sciences study design

All studies must disclose on these points even when the disclosure is negative.

Sample size

Data exclusions

Replication

Randomization

Blinding

## Reporting for specific materials, systems and methods

We require information from authors about some types of materials, experimental systems and methods used in many studies. Here, indicate whether each material, system or method listed is relevant to your study. If you are not sure if a list item applies to your research, read the appropriate section before selecting a response.

## Materials &amp; experimental systems

## Methods

| n/a                                 | Involved in the study                                           |
|-------------------------------------|-----------------------------------------------------------------|
| <input type="checkbox"/>            | <input checked="" type="checkbox"/> Antibodies                  |
| <input type="checkbox"/>            | <input checked="" type="checkbox"/> Eukaryotic cell lines       |
| <input checked="" type="checkbox"/> | <input type="checkbox"/> Palaeontology and archaeology          |
| <input type="checkbox"/>            | <input checked="" type="checkbox"/> Animals and other organisms |
| <input checked="" type="checkbox"/> | <input type="checkbox"/> Clinical data                          |
| <input checked="" type="checkbox"/> | <input type="checkbox"/> Dual use research of concern           |

| n/a                                 | Involved in the study                              |
|-------------------------------------|----------------------------------------------------|
| <input checked="" type="checkbox"/> | <input type="checkbox"/> ChIP-seq                  |
| <input type="checkbox"/>            | <input checked="" type="checkbox"/> Flow cytometry |
| <input checked="" type="checkbox"/> | <input type="checkbox"/> MRI-based neuroimaging    |

## Antibodies

## Antibodies used

Dilutions Used:  
FACS:  
Antibodies for flow cytometry were used at a concentration of 1:100 unless recommended otherwise by the manufacturer.

Antibody List:  
Flow Cytometry:  
Alexa (R) 488 anti-HA clone 6E2 Cell Signaling 2350S  
Anti-6-His Tag Antibody FITC Conjugated Bethyl A190-114F  
Anti-mouse CD3 antibody clone 145-2C11 (eBioscience) 14-0031-82  
Anti-mouse CD28 antibody clone 37.51 (BioXCell) BE0015-1

## Validation

All antibodies used throughout this study were validated by the vendors and/or are from well-known and characterized clones. Further details in validation can be found in Biologend Reproducibility and Validation webpage (<https://www.biologend.com/de-at/reproducibility/committed-to-functional-quality>), Cell Signaling Technology (<https://www.cellsignal.com/about-us/our-approach-process/antibody-validation-flow-cytometry>), eBioscience (<https://www.thermofisher.com/us/en/home/technical-resources/technical-reference-library/antibodies-immunoassays-support-center/antibodies-support.html>), BioXCell (<https://bxccl.com/faqs/>).

## Eukaryotic cell lines

Policy information about [cell lines and Sex and Gender in Research](#)

## Cell line source(s)

SF9 cells and expi293 cells were purchased from Thermo Fisher Scientific. HighFive cells were purchased from Expression systems. A375, B16F10, MC38 and EL4 cells were obtained from ATCC. mFcgammaRIV effector cells were purchased from Promega. EBY100 strain of yeast were obtained from ATCC.

## Authentication

Cell lines were periodically authenticated (at least once per year) using short tandem repeat analysis.

## Mycoplasma contamination

Cell lines were periodically tested for Mycoplasma contamination (at least once per year) using mycoplasma detection kit (Biotool).

Commonly misidentified lines  
(See [ICLAC](#) register)

None of the cell lines used are listed in the ICLAC database

## Animals and other research organisms

Policy information about [studies involving animals; ARRIVE guidelines](#) recommended for reporting animal research, and [Sex and Gender in Research](#)

## Laboratory animals

All animals were housed at Stanford University according to protocol and guidelines approved by the Administrative Panel on Lab Animal care (APLAC). C57BL6 mice were purchased from Jackson Labs (Cat 000664). All animals used were female mice, between age 7-10 weeks.

## Wild animals

No wild animals are used in this study

## Reporting on sex

Mouse, C57/BL6, female, 6-10 weeks of age

## Field-collected samples

No field-collected samples are used in this study

## Ethics oversight

Mice were used under protocols approved by Institutional Animal Care and Use Committee at the Stanford University.

Note that full information on the approval of the study protocol must also be provided in the manuscript.

## Plots

Confirm that:

- The axis labels state the marker and fluorochrome used (e.g. CD4-FITC).
- The axis scales are clearly visible. Include numbers along axes only for bottom left plot of group (a 'group' is an analysis of identical markers).
- All plots are contour plots with outliers or pseudocolor plots.
- A numerical value for number of cells or percentage (with statistics) is provided.

## Methodology

Sample preparation

All yeast cell populations were washed with MACS buffer before staining and washed twice with MACS buffer prior for flow cytometry analysis. All cell lines were washed with MACS buffer before staining and washed twice with MACS buffer prior for flow cytometry analysis. B16F10, MC38 and A375 cells were trypsinized briefly and resuspended in FACS buffer containing DAPI. EL4 cells were resuspended in FACS buffer containing DAPI. Mouse B cells were MACS isolated (Miltenyi) from spleens of C57BL6 mice. Mouse T lymphoblasts were activated in RPMI complete medium including 100 IU/mL mIL2 on plates coupled with 2.5 µg/mL of 2C11 anti-mouse CD3 antibody (eBioscience) and 5 µg/mL of anti-mouse CD28 antibody (BioXCell).

Instrument

BD Accuri C6 CytoFLEX

Software

BD Accuri C6 software CyteExpert 2.0.0.153

Cell population abundance

All cell populations were highly abundant. At least 5000 of total events are recorded for each sample.

Gating strategy

All samples were gated on SSC and FSC-H, followed by FSC-W and FSC-H. From here, the yeast cells were gated on HA+ or HA + SA647+. The primary cells these were further gated on CD3+CD4+, CD3+CD8+ or CD19+ for further analysis. Fluorophores were chosen to minimize spectral overlap.

- Tick this box to confirm that a figure exemplifying the gating strategy is provided in the Supplementary Information.
